# Supplementary material
Source: PubMed Central journal article supplement (PMC9054973)
Supplement: 40670_2021_1441_MOESM1_ESM.pdf [file 40670_2021_1441_MOESM1_ESM.pdf]

## Online Resource 1: Pre and Post-Survey Questions

What best describes you?

- Radiology Resident (R2)
- Radiology Resident (R3)
- Radiology Resident (R4)
- Radiology Resident (R5)
- Radiology Fellow
- Medical Student
- Neurology Resident
- Neurosurgery Resident

Content Questions:

1. In patients treated from glioblastoma, what is the timeframe where pseudoprogression generally occurs?
  - a. First 3 months after the surgical resection
  - b. First 6 months after the surgical resection
  - c. First 6 months after the beginning of radiation
  - d. First 3 months after the end of radiation
  - e. First 3 months after the beginning of chemotherapy
  - f. First 12 months after the end of chemotherapy
2. Patients with glioblastoma that is MGMT methylated have which of the following?
  - a. Higher rate of pseudoprogression
  - b. Lower rate of pseudoprogression
  - c. Higher rate of pseudoresponse
  - d. Lower rate of pseudoresponse
3. In patients with glioblastoma, what chemotherapy is associated with pseudoresponse?
  - a. Bevacizumab
  - b. Temozolomide
  - c. Pembrolizumab
  - d. Carmustine
4. How soon after glioblastoma surgery does a post-op MRI need to be done to avoid seeing granulation tissue?
  - a. Within 24 hours of the surgery
  - b. Within 36 hours of the surgery
  - c. Within 72 hours of the surgery
  - d. Within 96 hours of the surgery
5. Incidence of radiation necrosis peaks at \_\_\_\_\_ after the radiation treatment?
  - a. 3 months
  - b. 6 months
  - c. 12 months
  - d. 18 months
  - e. 24 months
6. What criteria is used to assess response to therapy in glioblastoma?
  - a. RANO Criteria
  - b. GlioRAD Criteria
  - c. RECIST Criteria
  - d. NRGBM Criteria

Subjective Assessment:

On a scale from 1-10, how comfortable are you interpreting a follow-up scan on a patient with glioblastoma?

1      2      3      4      5      6      7      8      9      10

On a scale from 1-10, how comfortable are you explaining what to look for on immediate post-op MRI after glioblastoma resection?

1      2      3      4      5      6      7      8      9      10

On a scale from 1-10, how comfortable are you explaining what pseudoprogression is?

1      2      3      4      5      6      7      8      9      10

On a scale from 1-10, how comfortable are you explaining what pseudoresponse is?

1      2      3      4      5      6      7      8      9      10

On a scale from 1-10, how comfortable are you explaining how perfusion imaging is used in the imaging of glioblastoma?

1      2      3      4      5      6      7      8      9      10

Teaching Method Questions (only included on Post-Survey):

How does this style of teaching (following a patient through disease course) compare to the typical radiology teaching case style?

Better

Worse

The same

Would you like to have access more cases like this for other diseases?

Yes

No

Indifferent

Please provide any additional comments regarding this teaching tool:

---

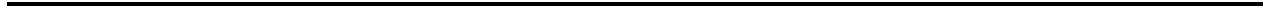

Patient-Centered, Case-Based Education in Radiology: An Interactive Module Following a Patient through their Disease Course from an Imaging Perspective  
Medical Student Educator.  
Y-Lan Khuong MD, Adam Ulano MD, Sergey Kulikov MD, Michael Bazylewicz, MD.

Author Affiliation: University of Vermont Medical Center Department of Radiology.  
Corresponding author email: [y-lan.khuong@uvmhealth.org](mailto:y-lan.khuong@uvmhealth.org)
